# Supplementary material for: Simplified PCR-Based Quantification of Proteins with DNA Aptamers and Methylcellulose as a Blocking Agent
Source: MDPI journal article supplement (doi:10.3390/ijms25010347), 2023-12-26
Supplement: s1 [file s1]

Supplementary material to:

# Simplified PCR-Based Quantification of Proteins with DNA Aptamers and Methylcellulose as a Blocking Agent

Oleksij Redcenko <sup>1,†</sup>, Magda Tumova <sup>1,†</sup> and Petr Draber <sup>1,\*</sup>

Laboratory of Signal Transduction, Institute of Molecular Genetics of the Czech Academy of Sciences, Vídeňská 1083, 142 20 Prague, Czech Republic; oleksij.redcenko@img.cas.cz (O.R.); magda.tumova@img.cas.cz (M.T.)

\* Correspondence: draberpe@img.cas.cz

† These authors contributed equally to this work.

## Contents

**Figure S1.** Methylcellulose inhibits the binding of 44/70 DNA aptamer and SP6 DNA aptamer to PCR wells similarly to or better than BSA.

**Figure S2.** A methylcellulose is comparable to BSA or Tween 20 as a blocking agent in the indirect ELISA to detect the nucleocapsid protein.

**Figure S3.** A methylcellulose-based blocking buffer, freshly prepared or stored for 120 days at 4 °C, is better than freshly prepared BSA-based blocking buffer in ELISA.

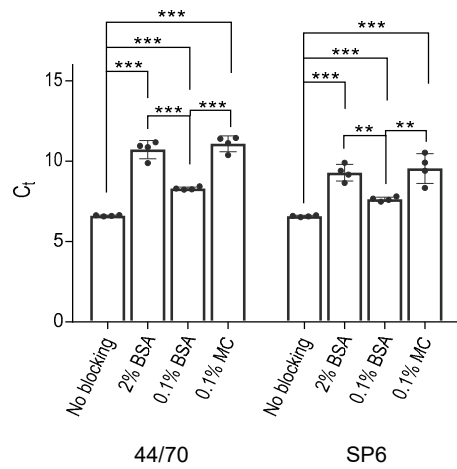

**Figure S1.** Methylcellulose inhibits the binding of 44/70 DNA aptamer and SP6 DNA aptamer to PCR wells similarly to or better than BSA. Wells of a VWR white 96-well PP plate were filled with MC or BSA at the indicated concentrations in PBS or with PBS alone as a control (No blocking). After 1 hour at 21 °C, all wells were washed with PBS and incubated with 10 nM 44/70 or SP6 aptamer in PBS for 1 hour at 37 °C. The wells were then washed with PBS to remove unbound aptamers, and the amounts of the aptamers bound were determined by qPCR using the aptamer-specific primers. Data represent means  $\pm$  S.D. of an experiment conducted in tetraplicates. Statistical significance of intergroup differences (unpaired Student's *t*-test) are indicated: \*\*  $P < 0.005$  \*\*\*  $P < 0.0005$ .

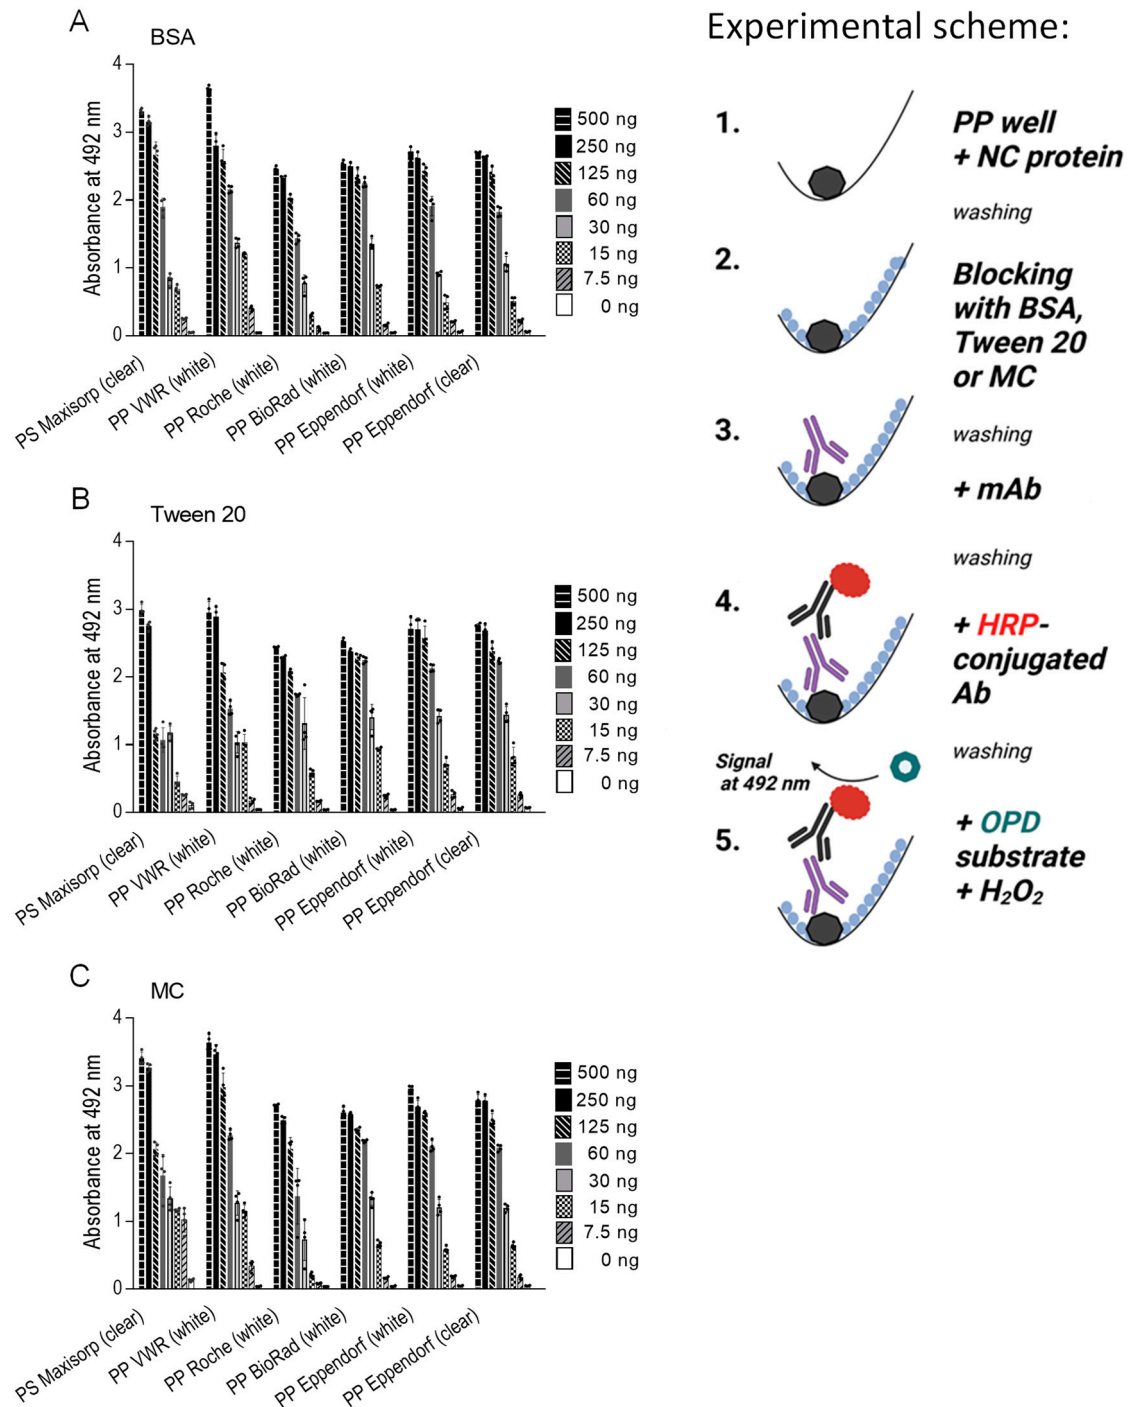

**Figure S2.** A methylcellulose is comparable to BSA or Tween 20 as a blocking agent in the indirect ELISA to detect the nucleocapsid protein. The wells of 96-well polystyrene (PS) plates (Nunc, Maxisorp), polypropylene (PP) white plates (VWR, Roche, BioRad, Eppendorf) or PP transparent plates (Eppendorf) were filled with various amounts of the nucleocapsid protein (0 – 500 ng/well) in PBS. After 1 hour at 37 °C, the unbound protein was washed out, and the wells were blocked for 1 hr at 37 °C with 0.1% BSA (**A**), 0.1% Tween 20 (**B**) or 0.1% MC (**C**); all in PBS. After removing unbound blocking reagents, the bound nucleocapsid protein was determined by anti-nucleocapsid mAb followed by HRP-conjugated anti-IgG antibody and OPD/H<sub>2</sub>O<sub>2</sub> as a substrate. Data represent means  $\pm$  S.D. from an experiment performed in tetraplicates.

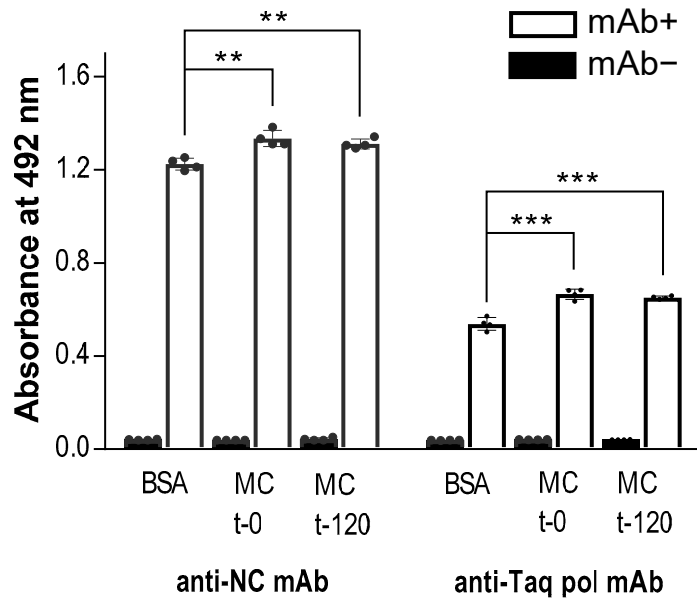

**Figure S3.** A methylcellulose-based blocking buffer, freshly prepared or stored for 120 days at 4 °C, is better than freshly prepared BSA-based blocking buffer in ELISA. Wells of 96-well polypropylene white plates (VWR) were filled with PBS containing a mAb (mAb+) specific for the nucleocapsid protein (anti-NC; 0.5 µg/well ) or Taq DNA polymerase (anti-Taq pol; 0.5 µg/well). PBS alone was used as a negative control (mAb-). After 1 hour, the unbound mAbs were washed out, and the wells were blocked with freshly prepared 0.1% BSA in PBS or 0.1% MC in PBS prepared from 1% MC freshly prepared stock (t-0) or 1% MC stock stored for 120 days at 4 °C (t-120). After removal of the blocking agents, the bound mAbs were detected with HRP-conjugated anti-IgG antibody diluted 1:30 000. The binding of the HRP-labeled antibody was quantified spectrophotometrically after adding HRP substrate O-phenylenediamine and H<sub>2</sub>O<sub>2</sub>. Data represent means ± SD from a typical experiment out of three performed in tetraplicates. Statistical significance of intergroup differences (unpaired Student's t-test) is indicated: \*\* P<0.005; \*\*\* P<0.0005.
